# Supplementary material
Source: PubMed Central journal article supplement (PMC1767778)
Supplement: heart_89_8_944__1.pdf [file heart_89_8_944__1.pdf]

## Web-only References

1. North American Symptomatic Carotid Endarterectomy Trial Collaborators. Beneficial effect of carotid endarterectomy in symptomatic patients with high-grade carotid stenosis. *N Engl J Med* 1991; 325:445-53.
2. Executive Committee for the Asymptomatic Carotid Atherosclerosis Study. Endarterectomy for asymptomatic carotid artery stenosis. *JAMA* 1995; 273:1421-8.
3. Randomised trial of endarterectomy for recently symptomatic carotid stenosis: final results of the MRC European Carotid Surgery Trial (ECST). *Lancet* 1998; 351:1379-87.
4. Barnett HJ, Taylor DW, Eliasziw M, et al. Benefit of carotid endarterectomy in patients with symptomatic moderate or severe stenosis. North American Symptomatic Carotid Endarterectomy Trial Collaborators. *N Engl J Med* 1998; 339:1415-25.
5. Kerber CW, Cromwell LD, Loehden OL. Catheter dilatation of proximal carotid stenosis during distal bifurcation endarterectomy. *Am J Neuroradiol* 1980; 1:348-9. *In a prospective series of 44 patients referred for CEA in an academic medical center in New York, the 30 day stroke or death rate was 11.4%, double than the percentage reported in the NASCET trials. The Authors conclude that data from CEA clinical trials cannot be generalized and local audits are necessary to better establish the risk/benefit ratio for individual hospitals and surgeons*
6. Bergeron P, Becquemin JP, Jausseran JM, et al. Percutaneous stenting of the internal carotid artery: the European CAST I Study. Carotid Artery Stent Trial. *J Endovasc Surg* 1999; 6:155-9.
7. Diethrich EB, Ndiaye M, Reid DB. Stenting in the carotid artery: initial experience in 110 patients. *J Endovasc Surg* 1996; 3:42-62.
8. Henry M, Amor M, Masson I, et al. Angioplasty and stenting of the extracranial carotid arteries. *J Endovasc Surg* 1998; 5:293-304.
9. Roubin GS, Yadav S, Iyer SS, Vitek J. Carotid stent-supported angioplasty: a neurovascular intervention to prevent stroke. *Am J Cardiol* 1996; 78:8-12.
10. Jordan WD, Jr., Voellinger DC, Doblal DD, Plyushcheva NP, Fisher WS, McDowell HA. Microemboli detected by transcranial Doppler monitoring in patients during carotid angioplasty versus carotid endarterectomy. *Cardiovasc Surg* 1999; 7:33-8.
11. Manninen HI, Rasanen HT, Vanninen RL, Vainio P, Hippelainen M, Kosma VM. Stent placement versus percutaneous transluminal angioplasty of human carotid arteries in cadavers in situ: distal embolization and findings at intravascular US, MR imaging and histopathologic analysis. *Radiology* 1999; 212:483-92.

12. Ohki T, Marin ML, Lyon RT, et al. Ex vivo human carotid artery bifurcation stenting: correlation of lesion characteristics with embolic potential. *J Vasc Surg* 1998; 27:463-71.
13. Gil-Peralta A, Mayol A, Marcos JR, et al. Percutaneous transluminal angioplasty of the symptomatic atherosclerotic carotid arteries. Results, complications, and follow-up. *Stroke* 1996; 27:2271-3.
14. Wholey MH, Jarmolowski CR, Eles G, Levy D, Buecthel J. Endovascular stents for carotid artery occlusive disease. *J Endovasc Surg* 1997; 4:326-38.
15. Yadav JS, Roubin GS, Iyer S, et al. Elective stenting of the extracranial carotid arteries. *Circulation* 1997; 95:376-81.
16. Naylor AR, Bolia A, Abbott RJ, et al. Randomized study of carotid angioplasty and stenting versus carotid endarterectomy: a stopped trial. *J Vasc Surg* 1998; 28:326-34.
17. Endovascular versus surgical treatment in patients with carotid stenosis in the Carotid and Vertebral Artery Transluminal Angioplasty Study (CAVATAS): a randomised trial. *Lancet* 2001; 357:1729-37.
18. Wholey MH, Wholey M, Bergeron P, et al. Current global status of carotid artery stent placement. *Cathet Cardiovasc Diagn* 1998; 44:1-6.
